# Supplementary material for: Intestinal transit time phenotype is not transferred through gut microbiota transplantation
Source: PeerJ journal article supplement (doi:10.7717/peerj.21064), 2026-05-08

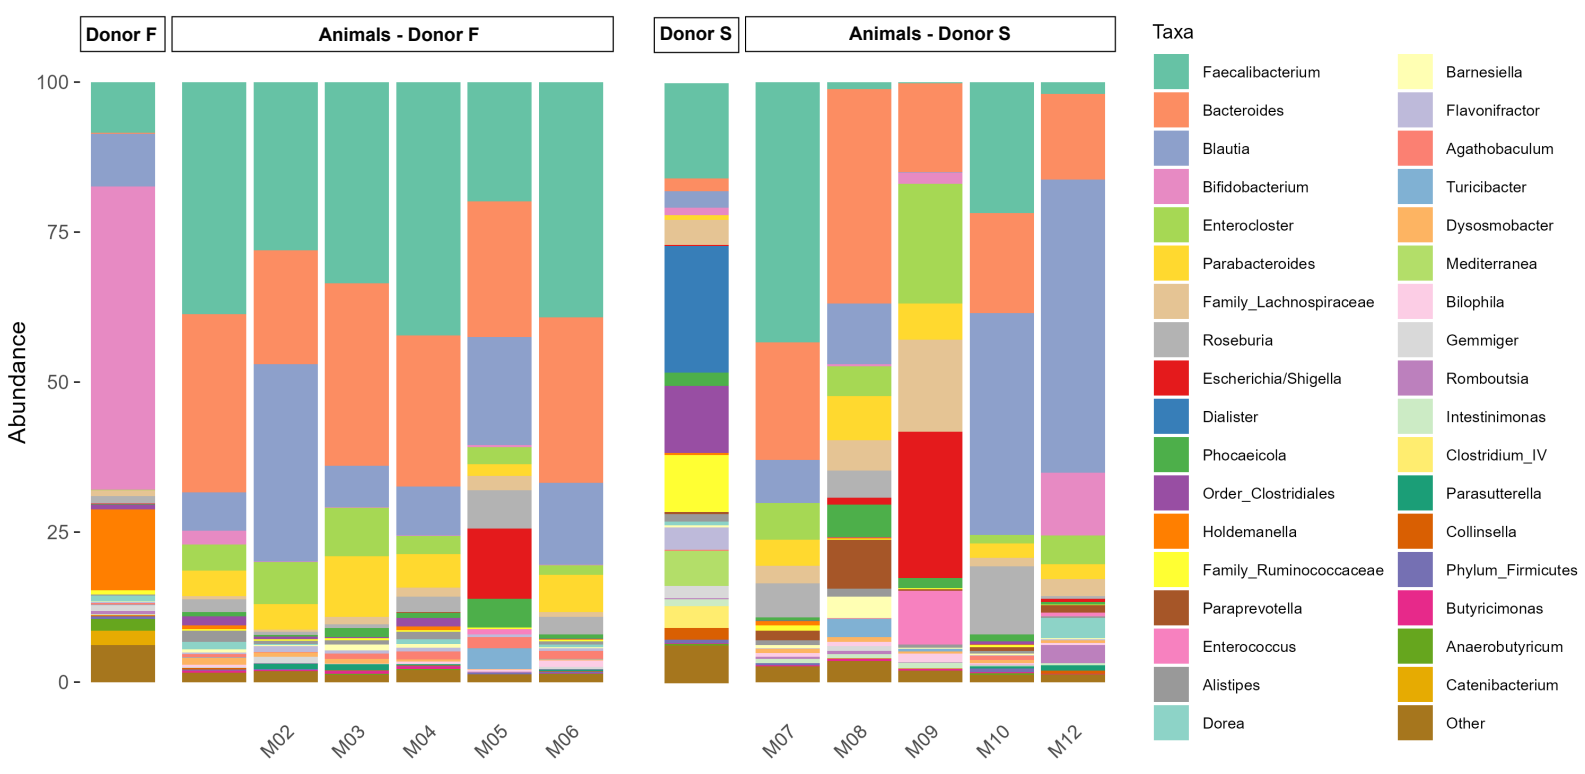

Supplement: SupplementaryFigure1.pdf [file SupplementaryFigure1.pdf]
